# Supplementary material for: The amniotic fluid proteome predicts imminent preterm delivery in asymptomatic women with a short cervix
Source: PubMed Central journal article supplement (PMC9276779; doi:10.1038/s41598-022-15392-3), 2022-07-11

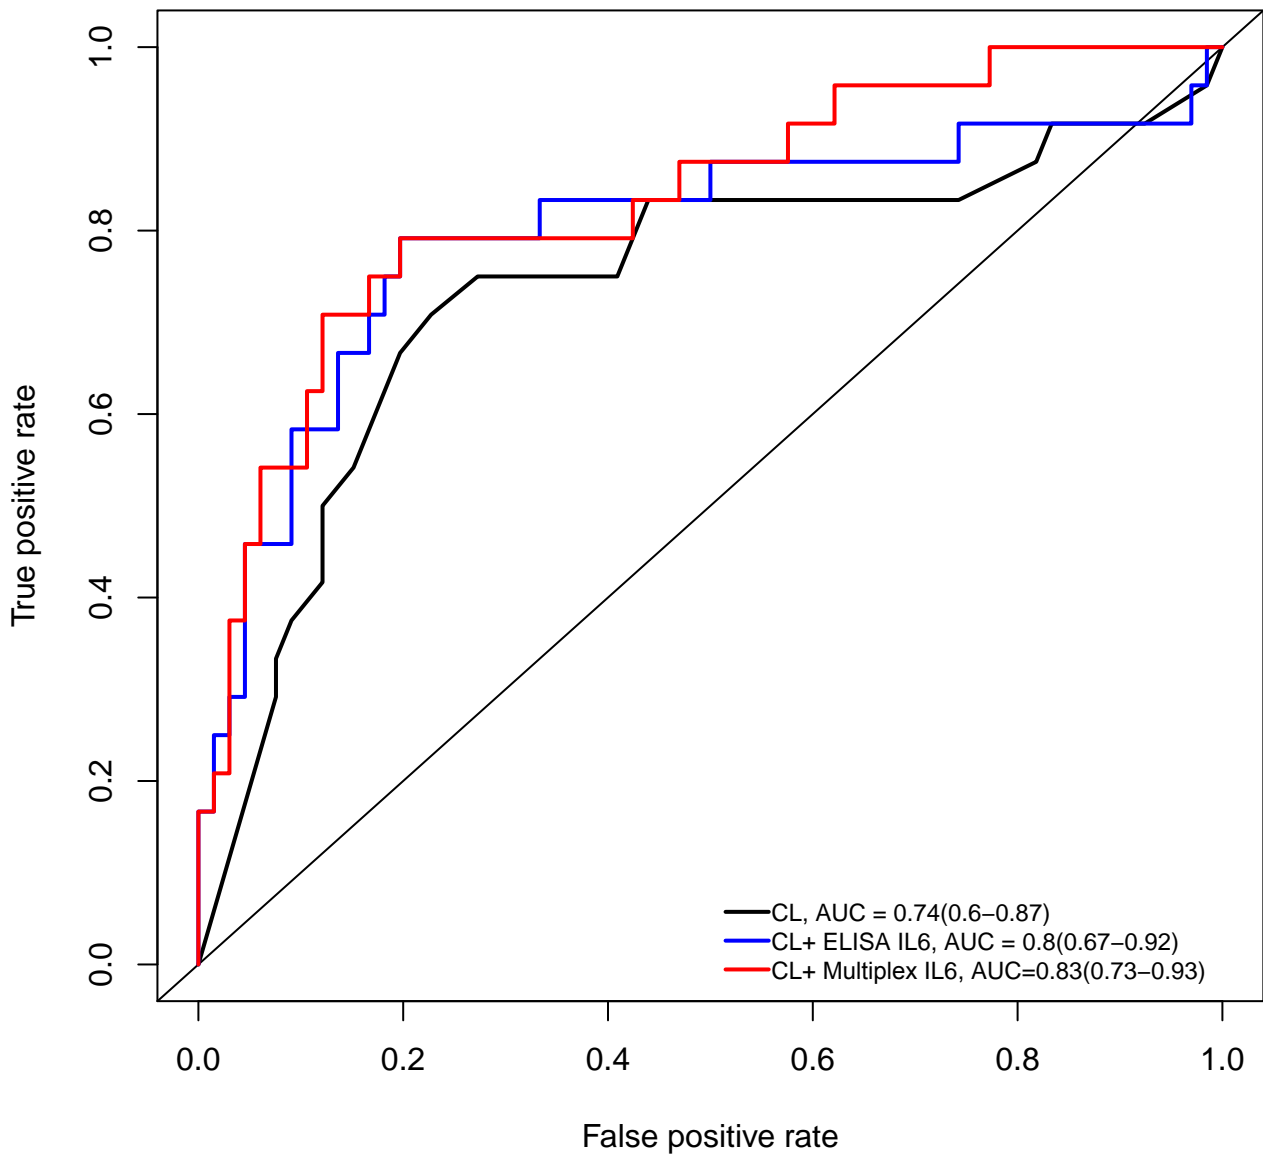

Supplement: 41598_2022_15392_MOESM3_ESM.pdf [file 41598_2022_15392_MOESM3_ESM.pdf]
